# Supplementary material for: Wearable sensors to predict improvement following an exercise intervention in patients with knee osteoarthritis
Source: Springer Nature journal article supplement (doi:10.1186/s12984-017-0309-z), 2017-09-12
Supplement: MOESM1 [file 15047266]

# OA Rehab Protocol Week 1

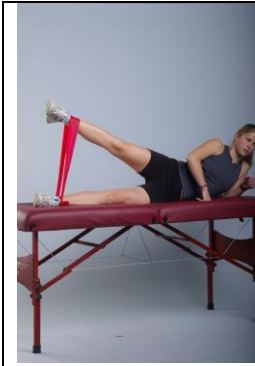

## **Hip Abductor Strengthening - Sidelying II**

Lying on your side, with theraband between ankles (or knees for less resistance).

Move involved leg upwards, keeping knee straight.

2 seconds out and 2 seconds in, control the motion throughout.

3 sets :10 reps

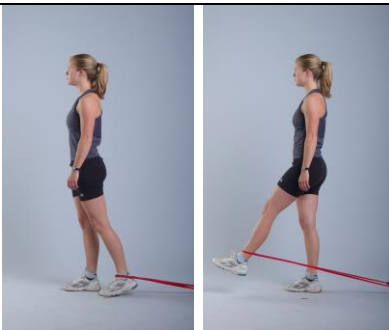

## **Hip Flexor Strengthening - Standing**

Place opposite foot beside band

Move involved leg forward, keeping knee straight or with slight “soft knee”.

2 seconds out and 2 seconds in, control the motion throughout.

3 sets: 10 reps

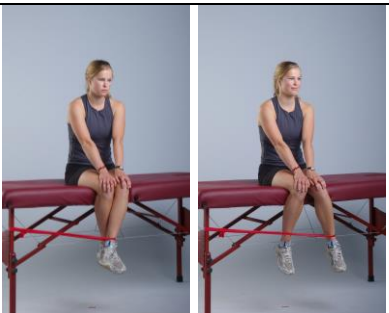

## **Hip External Rotator Strengthening - Seated**

In seated position, move leg outwards and return to starting position slowly.

Keep knees together.

2 seconds out and 2 seconds in, control the motion throughout.

3 sets; 10 reps

Sunday

Monday

Tuesday

Wednesday

Thursday

Friday

Saturday

## OA Rehab Protocol Week 2

|                                                                                     |                                                                                                                                                                                                                                                                                                        |
|-------------------------------------------------------------------------------------|--------------------------------------------------------------------------------------------------------------------------------------------------------------------------------------------------------------------------------------------------------------------------------------------------------|
| 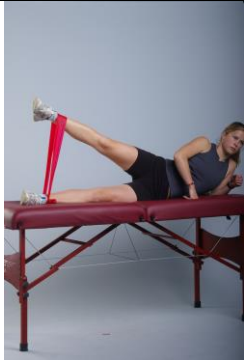   | <p><b>Hip Abductor Strengthening - Sidelying II</b></p> <p>Lying on your side, with theraband between ankles (or knees for less resistance).</p> <p>Move involved leg upwards, keeping knee straight.</p> <p>2 seconds out and 2 seconds in, control the motion throughout.</p> <p>3 sets: 15 reps</p> |
|    | <p><b>Hip Flexor Strengthening - Standing</b></p> <p>Place opposite foot beside band</p> <p>Move involved leg forward, keeping knee straight or with slight “soft knee”.</p> <p>2 seconds out and 2 seconds in, control the motion throughout.</p> <p>3 sets: 15 reps</p>                              |
|  | <p><b>Hip External Rotator Strengthening - Seated</b></p> <p>In seated position, move leg outwards and return to starting position slowly.</p> <p>Keep knees together.</p> <p>2 seconds out and 2 seconds in, control the motion throughout.</p> <p>3 sets; 15 reps</p>                                |
|  | <p><b>Core Stability - Two leg balancing</b></p> <p>Standing on Airex pad with both feet.</p> <p>Perform balancing for 30 second intervals. Repeat 3 times.</p> <p>Use light touch on a wall initially to help balance.</p> <p>3 sets: 30 sec</p>                                                      |

Sunday

Monday

Tuesday

Wednesday

Thursday

Friday

Saturday

## OA Rehab Protocol Week 3

|                                                                                     |                                                                                     |                                                                                                                                                                                                                                                                                      |
|-------------------------------------------------------------------------------------|-------------------------------------------------------------------------------------|--------------------------------------------------------------------------------------------------------------------------------------------------------------------------------------------------------------------------------------------------------------------------------------|
|    |    | <p><b>Hip Abductor Strengthening - Standing</b></p> <p>Place opposite foot behind band</p> <p>Move involved leg outward, keeping knee straight.</p> <p>2 seconds out and 2 seconds in, control the motion throughout.</p> <p>3 sets: __ reps _____ band</p>                          |
|    |    | <p><b>Hip Flexor Strengthening - Standing</b></p> <p>Place opposite foot beside band</p> <p>Move involved leg forward, keeping knee straight or with slight “soft knee”.</p> <p>2 seconds out and 2 seconds in, control the motion throughout.</p> <p>3 sets: __ reps _____ band</p> |
|  |  | <p><b>Hip External Rotator Strengthening - Seated</b></p> <p>In seated position, move leg outwards and return to starting position slowly.</p> <p>Keep knees together.</p> <p>2 seconds out and 2 seconds in, control the motion throughout.</p> <p>3 sets: __ reps _____ band</p>   |
|  |                                                                                     | <p><b>Core Stability - Two leg balancing</b></p> <p>Standing on Airex pad with both feet.</p> <p>Perform balancing for 45 second intervals. Repeat 3 times.</p> <p>Use light touch on a wall initially to help balance.</p> <p>3 sets: 45 sec</p>                                    |

Sunday

Monday

Tuesday

Wednesday

Thursday

Friday

Saturday

## OA Rehab Protocol Week 4-6

|                                                                                     |                                                                                                                                                                                                                                                                                                                                              |
|-------------------------------------------------------------------------------------|----------------------------------------------------------------------------------------------------------------------------------------------------------------------------------------------------------------------------------------------------------------------------------------------------------------------------------------------|
|    | <p><b>Hip Abductor Strengthening - Standing</b></p> <p>Place opposite foot behind band</p> <p>Move involved leg outward, keeping knee straight.</p> <p>2 seconds out and 2 seconds in, control the motion throughout.</p> <p>3 sets: __ reps _____ band</p>                                                                                  |
|    | <p><b>Hip Flexor Strengthening - Standing (band above knee)</b></p> <p>Place opposite foot beside band</p> <p>Move involved leg forward, keeping knee straight or with slight “soft knee”.</p> <p>2 seconds out and 2 seconds in, control the motion throughout.</p> <p>3 sets: __ reps _____ band</p>                                       |
|  | <p><b>Hip External Rotator Strengthening - Seated</b></p> <p>In seated position, move leg outwards and return to starting position slowly.</p> <p>Keep knees together.</p> <p>2 seconds out and 2 seconds in, control the motion throughout.</p> <p>3 sets: __ reps _____ band</p>                                                           |
|  | <p><b>Core Stability - One leg balancing</b></p> <p>Standing on Airex pad with one foot.</p> <p>Perform balancing for 30 second intervals. Repeat 3 times. Repeat for other foot.</p> <p>Use light touch on a wall initially to help balance.</p> <p>Perform with eyes closed for more difficulty.</p> <p>Week 5: 45 sec, Week 6: 60 sec</p> |
